# Supplementary material for: Social Risk Factors of Referral Non-Adherence to Eye Care Referrals for Children: A Scoping Review
Source: Research Square preprint supplement (doi:10.21203/rs.3.rs-6804155/v1), 2025-08-17
Supplement: Supplementary file 1 [file c65e2e564981fad9b2fd946a.docx]

# **Appendix I: Search strategy**

PubMed

Search conducted on July 21, 2023

| **Search** | **Query** | **Records Retrieved** |
| --- | --- | --- |
| #1 | **(("Child"[MeSH Terms] OR "child, preschool"[MeSH Terms] OR child*[tw] OR "preschool*"[tw] OR pre-school*[tw] OR kindergarten[tw] OR "primary school"[tw] OR "nursery school" OR "Adolescent"[MeSH] OR Adolescent[tw] OR "teen"[tw] OR "teens"[tw] OR "teenager*"[tw] OR "teenage"[tw] OR "youth"[tw] OR "kids"[tw] OR "elementary school*" OR "junior high" OR "middle school*"[tw] OR "high school*"[tw]) AND ("Vision Screening"[MeSH Terms] OR "vision screening"[tw] OR "vision screen"[tw] OR "eye screen"[tw] OR "eye screening"[tw] OR "visual screening"[tw] OR "vision test"[tw] OR "ocular screening"[tw])) AND ("Follow-Up Studies"[MeSH Terms] OR follow-up[tw] OR "Continuity of Patient Care"[MeSH] OR "Treatment Adherence and Compliance"[MeSH Terms:noExp] OR "Patient Acceptance of Health Care"[MeSH] OR "Patient Compliance"[MeSH Terms:noexp] OR "Referral and Consultation"[MeSH Terms:noexp] OR "Appointments and Schedules"[MeSH Terms:noexp] OR appointment*[tw] OR schedule*[tw] OR scheduling[tw] OR adherence[tw] OR compliance[tw] OR "Health Services Accessibility"[MeSH Terms:noexp] OR "Treatment Refusal"[MeSH Terms:noexp] OR recommend*[tw] OR refer*[tw] OR barrier*[tw] OR facilitator*[tw] OR obstacle*[tw] OR challenge*[tw] OR "access to care"[tw] OR "post-screening"[tw] OR "Attitude to Health"[MeSH] OR utilization[tw] OR "medical care coordination"[tw] OR non-attendance[tw])** | 1,079 |
| #2 | **Limited to English** | 1,003 |
